# Supplementary material for: Effect of nanostructuring on the interaction of CO2with molybdenum carbide nanoparticles
Source: Royal Society of Chemistry journal article supplement (doi:10.1039/d2cp01143c), 2022-01-01
Supplement: d2cp01143c1.pdf [file d2cp01143c1.pdf]

# Effect of nanostructuring on the interaction of CO<sub>2</sub> with molybdenum carbide nanoparticles

Carlos Jimenez-Orozco,<sup>\*a</sup> Marc Figueras,<sup>b</sup> Elizabeth Flórez,<sup>a</sup> Francesc Viñes,<sup>\*b</sup>  
José A. Rodríguez,<sup>c</sup> Francesc Illas<sup>b</sup>

<sup>a</sup> *Universidad de Medellín, Facultad de Ciencias Básicas, Grupo de Materiales con Impacto (Mat&mpac), Carrera 87 No 30-65, Medellín, Colombia*

<sup>b</sup> *Universitat de Barcelona, Departament de Ciència de Materials i Química Física & Institut de Química Teòrica i Computacional (IQTCUB), c/Martí i Franquès 1-11, 08028 Barcelona, Spain.*

<sup>c</sup> *Brookhaven National Laboratory, Chemistry Division, Upton, New York 11973, United States of America*

## Index of Contents

**Table S1.** Effect of vacuum region extent to the  $E_{\text{ads}}$ .

**Table S2.** Structural isomers of the nanoparticles in the  $S_{\text{set}}$  as predicted from global minima search.

**Table S3.** Number of initial and final CO<sub>2</sub> different bonding modes considered.

**Table S4.** Bonding model, energy quantities, and Bader charges,  $Q$ , for adsorbed CO<sub>2</sub>.

**Fig. S1.** Geometry of the most stable isomers of nanoparticles in the  $S_{\text{set}}$  that are considered to study CO<sub>2</sub> adsorption.

**Fig. S2.** Most stable structure and adsorption energy for CO<sub>2</sub> interacting with Mo<sub>12</sub>C<sub>12</sub>, Mo<sub>24</sub>C<sub>24</sub>, and Mo<sub>32</sub>C<sub>32</sub> nanoparticles on vertex (top), facet (middle), and lateral (bottoms) modes.

**Fig. S3.** Top and side view for CO<sub>2</sub> adsorption on extended surfaces  $\delta$ -MoC(001) (left),  $\beta$ -Mo<sub>2</sub>C(001)-C (middle), and  $\beta$ -Mo<sub>2</sub>C(001)-Mo.

**Fig. S4.** CO<sub>2</sub> adsorption on small Mo<sub>4</sub>C<sub>6</sub>, Mo<sub>5</sub>C<sub>6</sub>, Mo<sub>6</sub>C<sub>4</sub>, Mo<sub>6</sub>C<sub>5</sub>, and Mo<sub>6</sub>C<sub>6</sub> and intermediate Mo<sub>8</sub>C<sub>12</sub>, Mo<sub>10</sub>C<sub>12</sub>, Mo<sub>12</sub>C<sub>6</sub>, Mo<sub>12</sub>C<sub>8</sub>, Mo<sub>12</sub>C<sub>10</sub>, and Mo<sub>14</sub>C<sub>13</sub>.

**Fig. S5.** Attachment energy,  $E_{\text{att}}$ , and Bader charges,  $Q$ , for CO<sub>2</sub> adsorbed on small nanoparticles via  $\eta^3$ -CO<sub>2</sub>- $\mu^2$ -C<sub>B</sub>O<sub>M</sub>O<sub>M</sub> mode as a function of the Mo/C ratio.

**Fig. S6.** CO<sub>2</sub> deformation energy,  $E_{\text{def}}$ , and Bader charges,  $Q$ , for CO<sub>2</sub> adsorbed on small nanoparticles via  $\eta^3$ -CO<sub>2</sub>- $\mu^2$ -C<sub>B</sub>O<sub>M</sub>O<sub>M</sub> mode as a function of the Mo/C ratio.

**Fig. S7.** CO<sub>2</sub> attachment energy,  $E_{\text{att}}$ , and Bader charges,  $Q$ , on the adsorbed CO<sub>2</sub> molecule for the most stable CO<sub>2</sub> bonding mode on the different nanoparticles.

**Table S1.** Test calculations ensuring convergence of CO<sub>2</sub>  $E_{\text{ads}}$  with respect to vacuum region extent for Mo<sub>4</sub>C<sub>6</sub> and Mo<sub>32</sub>C<sub>32</sub> models. Only the adsorption site displaying the largest  $E_{\text{ads}}$  has been considered. ZPE is not included.

| <b>Nanoparticle</b>                  | <b>Vacuum (Å)</b> | <b><math>E_{\text{ads}}</math> (eV)</b> |
|--------------------------------------|-------------------|-----------------------------------------|
| <b>Mo<sub>4</sub>C<sub>6</sub></b>   | 10.0              | -1.70                                   |
|                                      | 12.5              | -1.70                                   |
|                                      | 15.0              | -1.70                                   |
|                                      | 17.5              | -1.69                                   |
|                                      | 20.0              | -1.69                                   |
| <b>Mo<sub>32</sub>C<sub>32</sub></b> | 10.0              | -2.01                                   |
|                                      | 12.5              | -2.00                                   |
|                                      | 15.0              | -2.00                                   |
|                                      | 17.5              | -2.00                                   |
|                                      | 20.0              | -2.00                                   |

**Table S2.** Structural isomers of the  $S_{\text{set}}$  nanoparticles predicted from the global minima search method used in this work. Relative energies ( $\Delta E_{\text{rel}}$ ) to the most stable isomer for each nanoparticle are listed. All values are given in eV. The <sup>a</sup> superindex denotes the most stable isomer as predicted by the cascade algorithm (see discussion in the main text).

| <b>Nanoparticle</b>                | <b>Isomer</b> | <b><math>\Delta E_{\text{rel}}</math></b> |
|------------------------------------|---------------|-------------------------------------------|
| <b>Mo<sub>4</sub>C<sub>6</sub></b> | 1             | 0.00                                      |
|                                    | 2             | 1.05                                      |
|                                    | 3             | 1.49                                      |
|                                    | 4             | 1.50 <sup>a</sup>                         |
|                                    | 5             | 1.56                                      |
|                                    | 6             | 1.67                                      |
|                                    | 7             | 1.71                                      |
|                                    | 8             | 2.25                                      |
|                                    | 9             | 2.51                                      |
|                                    | 10            | 2.52                                      |
|                                    | 11            | 2.53                                      |
|                                    | 12            | 2.55                                      |
|                                    | 13            | 3.24                                      |
|                                    | 14            | 4.87                                      |
|                                    | 15            | 5.89                                      |
| <b>Mo<sub>5</sub>C<sub>6</sub></b> | 1             | 0.00                                      |
|                                    | 2             | 0.02                                      |
|                                    | 3             | 0.07 <sup>a</sup>                         |
|                                    | 4             | 0.09                                      |
|                                    | 5             | 0.28                                      |
|                                    | 6             | 0.52                                      |
|                                    | 7             | 0.79                                      |
|                                    | 8             | 0.91                                      |
|                                    | 9             | 1.01                                      |
|                                    | 10            | 2.93                                      |
| <b>Mo<sub>6</sub>C<sub>4</sub></b> | 1             | 0.000                                     |
|                                    | 2             | 0.15                                      |
|                                    | 3             | 0.54 <sup>a</sup>                         |

|                                    |    |                   |
|------------------------------------|----|-------------------|
|                                    | 4  | 0.63              |
|                                    | 5  | 0.69              |
|                                    | 6  | 0.97              |
|                                    | 7  | 1.37              |
|                                    | 8  | 1.67              |
|                                    | 9  | 1.81              |
|                                    | 10 | 2.14              |
|                                    | 11 | 3.00              |
|                                    | 12 | 3.61              |
| <hr/>                              |    |                   |
| <b>Mo<sub>6</sub>C<sub>5</sub></b> | 1  | 0.00              |
|                                    | 2  | 0.26 <sup>a</sup> |
|                                    | 3  | 0.49              |
|                                    | 4  | 0.60              |
|                                    | 5  | 1.17              |
|                                    | 6  | 1.30              |
|                                    | 7  | 1.45              |
|                                    | 8  | 2.06              |
|                                    | 9  | 2.17              |
|                                    | 10 | 3.60              |
| <hr/>                              |    |                   |
| <b>Mo<sub>6</sub>C<sub>6</sub></b> | 1  | 0.00 <sup>a</sup> |
|                                    | 2  | 1.50              |
|                                    | 3  | 1.73              |
|                                    | 4  | 2.05              |
|                                    | 5  | 2.62              |
|                                    | 6  | 3.17              |
|                                    | 7  | 3.60              |
|                                    | 8  | 3.61              |
|                                    | 9  | 3.81              |
|                                    | 10 | 3.86              |
|                                    | 11 | 4.93              |
| <hr/>                              |    |                   |

**Table S3.** Number of initial, #Ini, and different final, #Fin, CO<sub>2</sub> bonding modes for each studied nanoparticle, together with the percentage, %diff, of different final geometries gained for each case; for instance, for Mo<sub>5</sub>C<sub>6</sub> isomer #1, the seventy-two initial geometries led to eleven different final geometries, representing a 15% of the initial geometries.

| <b>Nanoparticle</b>                  | <b>Isomer</b>  | <b>#Ini</b> | <b>#Fin</b> | <b>%diff</b> |
|--------------------------------------|----------------|-------------|-------------|--------------|
| <b>Mo<sub>4</sub>C<sub>6</sub></b>   | 1              | 5           | 5           | 100          |
|                                      | 2              | 9           | 5           | 56           |
|                                      | 3              | 5           | 5           | 100          |
|                                      | 4 <sup>a</sup> | 32          | 22          | 69           |
|                                      | 5              | 20          | 9           | 45           |
| <b>Mo<sub>5</sub>C<sub>6</sub></b>   | 1              | 72          | 11          | 15           |
|                                      | 2              | 28          | 18          | 64           |
|                                      | 3 <sup>b</sup> | 11          | 7           | 64           |
|                                      | 4              | 21          | 7           | 33           |
| <b>Mo<sub>6</sub>C<sub>4</sub></b>   | 1              | 61          | 15          | 25           |
|                                      | 2              | 55          | 9           | 16           |
|                                      | 3 <sup>b</sup> | 24          | 18          | 75           |
|                                      | 4              | 54          | 14          | 26           |
|                                      | 5              | 56          | 11          | 20           |
| <b>Mo<sub>6</sub>C<sub>5</sub></b>   | 1              | 46          | 30          | 65           |
|                                      | 2 <sup>b</sup> | 20          | 6           | 30           |
| <b>Mo<sub>6</sub>C<sub>6</sub></b>   | 1              | 22          | 17          | 77           |
| <b>Mo<sub>8</sub>C<sub>12</sub></b>  | 1              | 15          | 11          | 73           |
| <b>Mo<sub>10</sub>C<sub>12</sub></b> | 1              | 36          | 21          | 58           |
| <b>Mo<sub>12</sub>C<sub>6</sub></b>  | 1              | 93          | 65          | 70           |
| <b>Mo<sub>12</sub>C<sub>8</sub></b>  | 1              | 125         | 58          | 46           |
| <b>Mo<sub>12</sub>C<sub>10</sub></b> | 1              | 130         | 64          | 49           |
| <b>Mo<sub>12</sub>C<sub>12</sub></b> | 1              | 47          | 37          | 79           |
| <b>Mo<sub>14</sub>C<sub>13</sub></b> | 1              | 18          | 10          | 56           |
| <b>Mo<sub>24</sub>C<sub>24</sub></b> | 1              | 45          | 38          | 84           |
| <b>Mo<sub>32</sub>C<sub>32</sub></b> | 1              | 36          | 25          | 69           |

<sup>a</sup> Mo<sub>4</sub>C<sub>6</sub> isomers not considered for further characterization.

<sup>b</sup> Belongs to the nanoparticle obtained *via* cascade procedure in Ref. 1

**Table S4.** Most stable adsorption conformation, energy quantities, and Bader charges,  $Q$ , in  $e$ , for the adsorbed  $\text{CO}_2$ .  $E_{ads}$ ,  $E_{def}$ ,  $E_{dist}$ , and  $E_{att}$  stand for the adsorption energy, the nanoparticle distortion energy,  $\text{CO}_2$  deformation energy, and attachment energy, respectively, all given in eV. Mo/C corresponds to the atomic ratio. Results for the extended surfaces in the bottom rows, reproduced from previous work—*cf.* Refs. 2 and 3—are included for comparison.

| System                              | Isomer | Bonding mode                                                        | $E_{ads}$ | $E_{dist}$ | $E_{def}$ | $E_{att}$ | $Q$   | Mo/C |
|-------------------------------------|--------|---------------------------------------------------------------------|-----------|------------|-----------|-----------|-------|------|
| Mo <sub>4</sub> C <sub>6</sub>      | 1      | $\eta^2\text{-CO}_2\text{-}\mu^2\text{-C}_C\text{O}_M$              | -1.74     | 0.20       | 2.82      | -4.76     | -0.57 | 0.67 |
|                                     | 2      | $\eta^3\text{-CO}_2\text{-}\mu^2\text{-C}_B\text{O}_M\text{O}_M$    | -2.38     | 0.18       | 1.67      | -4.23     | -0.80 |      |
|                                     | 3      | $\eta^2\text{-CO}_2\text{-}\mu^2\text{-C}_C\text{O}_M$              | -3.10     | 0.00       | 2.98      | -6.08     | -0.65 |      |
|                                     | 4      | $\eta^3\text{-CO}_2\text{-}\mu^2\text{-C}_B\text{O}_M\text{O}_M$    | -1.95     | 0.23       | 1.65      | -3.83     | -1.05 |      |
|                                     | 5      | $\eta^3\text{-CO}_2\text{-}\mu^2\text{-C}_B\text{O}_M\text{O}_M$    | -2.61     | 0.07       | 2.15      | -4.83     | -0.93 |      |
| Mo <sub>5</sub> C <sub>6</sub>      | 1      | $\eta^3\text{-CO}_2\text{-}\mu^2\text{-C}_B\text{O}_M\text{O}_M$    | -2.34     | 0.39       | 1.67      | -4.40     | -0.93 | 0.83 |
|                                     | 2      | $\eta^3\text{-CO}_2\text{-}\mu^2\text{-C}_B\text{O}_M\text{O}_M$    | -2.65     | 0.19       | 1.86      | -4.70     | -0.97 |      |
|                                     | 3      | $\eta^2\text{-CO}_2\text{-}\mu^2\text{-C}_C\text{O}_M$              | -1.73     | 0.44       | 3.12      | -5.29     | -0.71 |      |
|                                     | 4      | $\eta^3\text{-CO}_2\text{-}\mu^2\text{-C}_B\text{O}_M\text{O}_M$    | -2.28     | 0.39       | 3.12      | -5.29     | -0.71 |      |
| Mo <sub>6</sub> C <sub>4</sub>      | 1      | $\eta^3\text{-CO}_2\text{-}\mu^2\text{-C}_B\text{O}_M\text{O}_M$    | -2.23     | 0.13       | 1.77      | -4.13     | -0.90 | 1.50 |
|                                     | 2      | $\eta^3\text{-CO}_2\text{-}\mu^2\text{-C}_B\text{O}_M\text{O}_M$    | -2.61     | 0.39       | 1.86      | -4.86     | -0.95 |      |
|                                     | 3      | $\eta^3\text{-CO}_2\text{-}\mu^2\text{-C}_B\text{O}_M\text{O}_M$    | -3.18     | 0.08       | 1.86      | -5.12     | -1.04 |      |
|                                     | 4      | $\eta^3\text{-CO}_2\text{-}\mu^2\text{-C}_B\text{O}_M\text{O}_M$    | -2.79     | 0.35       | 2.09      | -5.03     | -0.77 |      |
|                                     | 5      | $\eta^3\text{-CO}_2\text{-}\mu^2\text{-C}_B\text{O}_M\text{O}_M$    | -2.57     | 0.00       | 1.91      | -4.48     | -1.00 |      |
| Mo <sub>6</sub> C <sub>5</sub>      | 1      | $\eta^3\text{-CO}_2\text{-}\mu^2\text{-C}_B\text{O}_M\text{O}_M$    | -2.68     | 0.07       | 1.70      | -4.45     | -0.94 | 1.20 |
|                                     | 2      | $\eta^2\text{-CO}_2\text{-}\mu^3\text{-C}_B\text{O}_B$              | -2.67     | 0.35       | 3.50      | -6.52     | -1.25 |      |
| Mo <sub>6</sub> C <sub>6</sub>      | 1      | $\eta^2\text{-CO}_2\text{-}\mu^2\text{-C}_C\text{O}_M$              | -1.44     | 0.61       | 2.99      | -5.04     | -0.70 | 1.00 |
| Mo <sub>8</sub> C <sub>12</sub>     |        | $\eta^2\text{-CO}_2\text{-}\mu^1\text{-C}_M\text{O}_M$              | -1.03     | 0.22       | 1.96      | -3.21     | -0.53 | 0.67 |
| Mo <sub>10</sub> C <sub>12</sub>    | 1      | $\eta^3\text{-CO}_2\text{-}\mu^3\text{-C}_C\text{O}_M\text{O}_M$    | -1.73     | 0.14       | 2.38      | -4.25     | -0.58 | 0.83 |
| Mo <sub>12</sub> C <sub>6</sub>     | 1      | $\eta^3\text{-CO}_2\text{-}\mu^3\text{-C}_{HW}\text{O}_M\text{O}_M$ | -2.56     | 0.68       | 3.41      | -6.65     | -1.35 | 2.00 |
| Mo <sub>12</sub> C <sub>8</sub>     | 1      | $\eta^3\text{-CO}_2\text{-}\mu^3\text{-C}_{HW}\text{O}_M\text{O}_M$ | -2.44     | 0.40       | 4.26      | -7.10     | -1.28 | 1.50 |
| Mo <sub>12</sub> C <sub>10</sub>    | 1      | $\eta^3\text{-CO}_2\text{-}\mu^3\text{-C}_{HW}\text{O}_M\text{O}_M$ | -2.03     | 0.60       | 4.10      | -6.73     | -1.42 | 1.20 |
| Mo <sub>12</sub> C <sub>12</sub>    | 1      | $\eta^2\text{-CO}_2\text{-}\mu^2\text{-C}_C\text{O}_M$              | -1.53     | 0.65       | 2.95      | -5.13     | -0.58 | 1.00 |
| Mo <sub>14</sub> C <sub>13</sub>    |        | $\eta^3\text{-CO}_2\text{-}\mu^3\text{-C}_C\text{O}_M\text{O}_M$    | -1.45     | 0.26       | 2.26      | -3.97     | -0.73 | 1.08 |
| Mo <sub>24</sub> C <sub>24</sub>    |        | $\eta^2\text{-CO}_2\text{-}\mu^2\text{-C}_C\text{O}_M$              | -2.14     | 0.37       | 3.48      | -5.99     | -0.42 | 1.00 |
| Mo <sub>32</sub> C <sub>32</sub>    |        | $\eta^3\text{-CO}_2\text{-}\mu^3\text{-C}_B\text{O}_M\text{O}_M$    | -1.97     | 0.93       | 3.50      | -6.40     | -0.61 | 1.00 |
| $\delta\text{-MoC(001)}$            |        | $\eta^1\text{-CO}_2\text{-}\mu^1\text{-C}_C$                        | -1.20     | 0.16       | 2.48      | -3.84     | -0.62 | 1.00 |
| $\beta\text{-Mo}_2\text{C(001)-C}$  |        | $\eta^2\text{-CO}_2\text{-}\mu^2\text{-C}_C\text{O}_M$              | -1.32     | 0.53       | 2.83      | -4.68     | -0.56 | 2.00 |
| $\beta\text{-Mo}_2\text{C(001)-Mo}$ |        | $\eta^3\text{-CO}_2\text{-}\mu^3\text{-C}_B\text{O}_M\text{O}_B$    | -1.87     | 0.15       | 3.12      | -5.14     | -0.87 | 2.00 |

**Fig. S1.** Geometry of most stable isomers of the considered nanoparticles in the  $S_{\text{set}}$ . Mo and C atoms are shown as magenta and brown spheres, respectively.

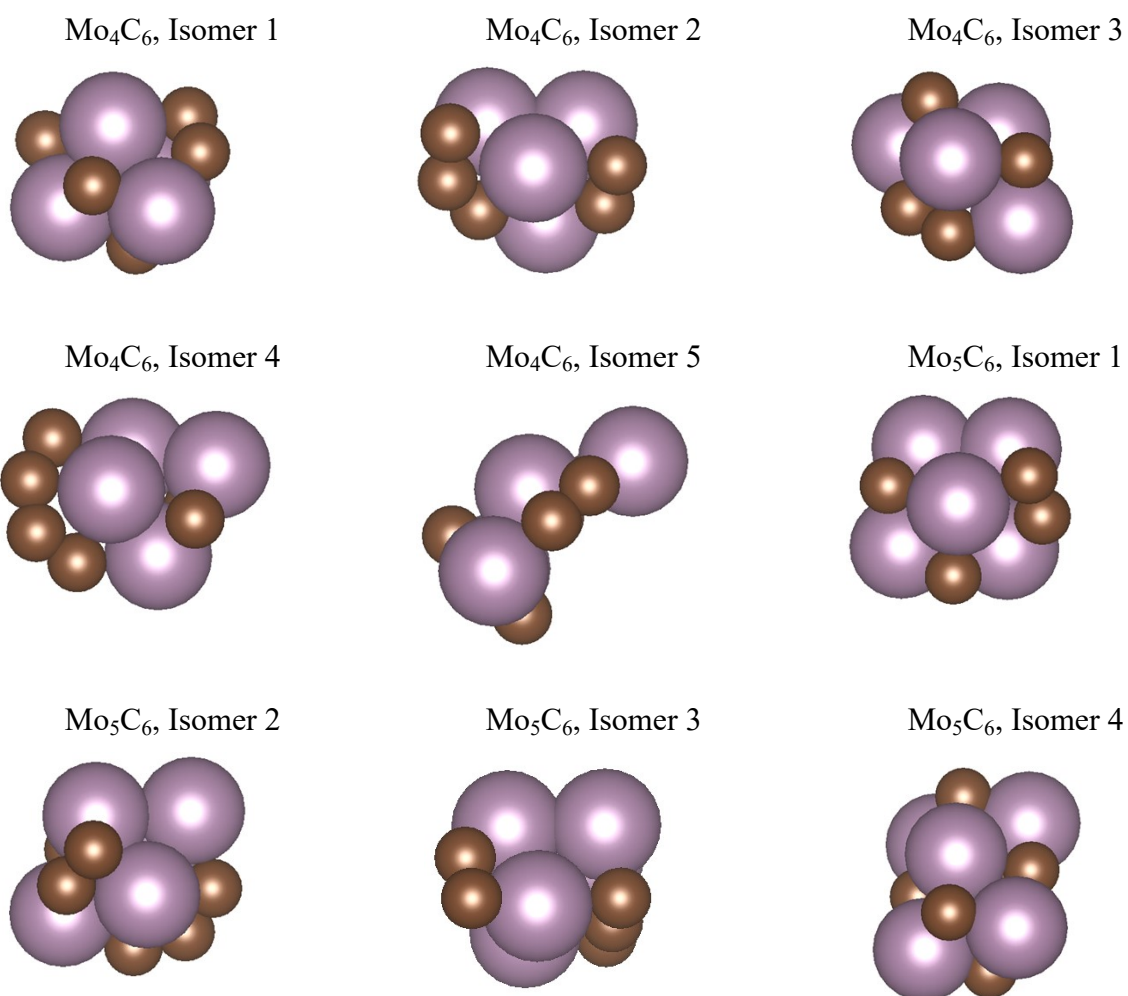

Mo<sub>6</sub>C<sub>4</sub>, Isomer 1

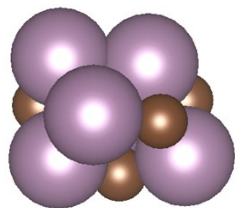

Mo<sub>6</sub>C<sub>4</sub>, Isomer 2

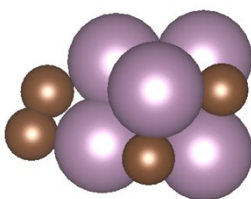

Mo<sub>6</sub>C<sub>4</sub>, Isomer 3

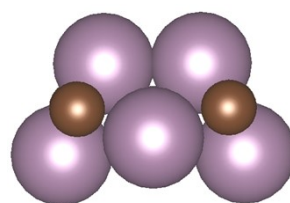

Mo<sub>6</sub>C<sub>4</sub>, Isomer 4

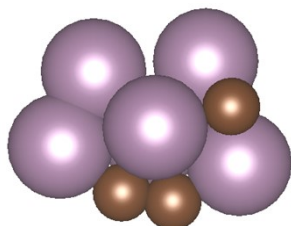

Mo<sub>6</sub>C<sub>4</sub>, Isomer 5

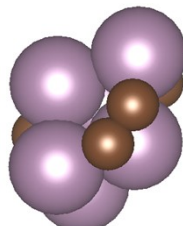

Mo<sub>6</sub>C<sub>5</sub>, Isomer 1

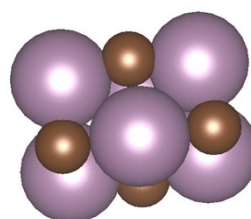

Mo<sub>6</sub>C<sub>5</sub>, Isomer 2

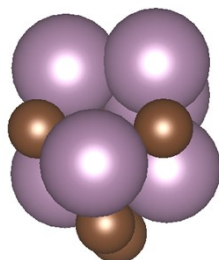

Mo<sub>6</sub>C<sub>6</sub>, Isomer 1

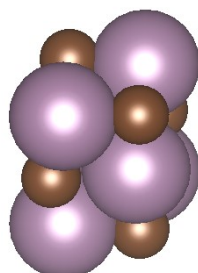



**Fig. S2.** Most stable structure and adsorption energy for CO<sub>2</sub> interacting with Mo<sub>12</sub>C<sub>12</sub>, Mo<sub>24</sub>C<sub>24</sub>, and Mo<sub>32</sub>C<sub>32</sub> nanoparticles on vertex (top images), facet (middle images), and lateral (bottom images) modes. Colors as in Fig. S1, but CO<sub>2</sub> C and O atoms are shown as black and red spheres. Adsorption site labeling and  $E_{ads}$  values are also provided.

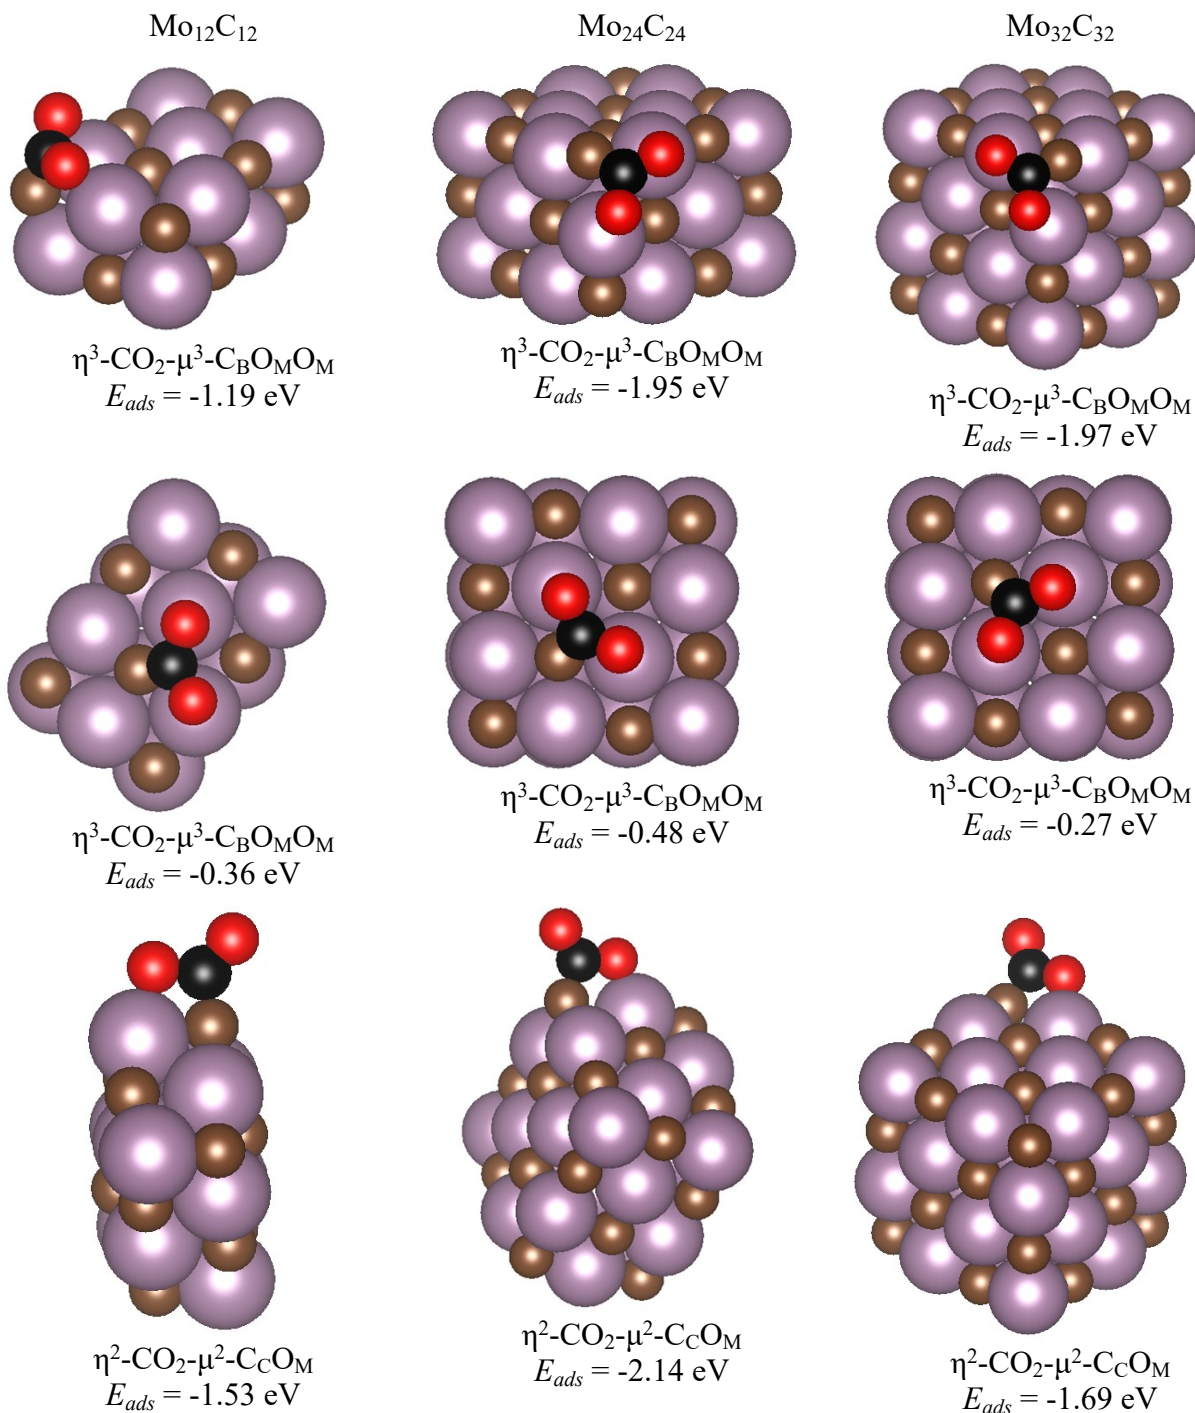

**Fig. S3.** Top (top images) and side (bottom images) views for CO<sub>2</sub> adsorption on extended surfaces  $\delta$ -MoC (001) (left),  $\beta$ -Mo<sub>2</sub>C(001)-C (middle), and  $\beta$ -Mo<sub>2</sub>C(001)-Mo, reproduced from Refs. 2 and 3, and included for comparison. Colors as in Figs. S1 and S2. Adsorption modes and energies are included.

$$\eta^1\text{-CO}_2\text{-}\mu^1\text{-C}_C \\ E_{ads} = -1.20 \text{ eV}$$

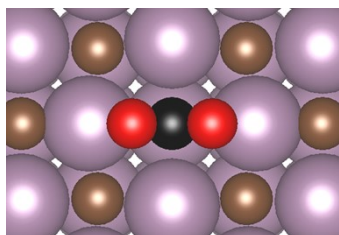

$$\eta^2\text{-CO}_2\text{-}\mu^2\text{-C}_C\text{O}_M \\ E_{ads} = -1.32 \text{ eV}$$

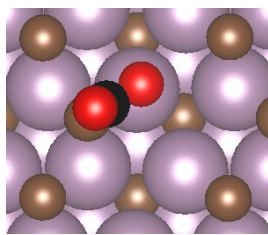

$$\eta^3\text{-CO}_2\text{-}\mu^3\text{-C}_B\text{O}_M\text{O}_B \\ E_{ads} = -1.87 \text{ eV}$$

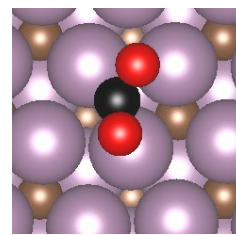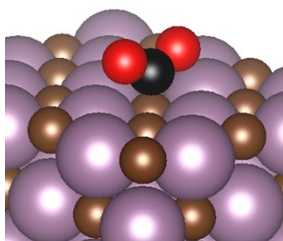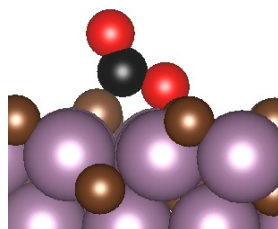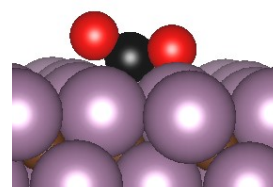

**Fig. S4.** CO<sub>2</sub> adsorption on small Mo<sub>4</sub>C<sub>6</sub>, Mo<sub>5</sub>C<sub>6</sub>, Mo<sub>6</sub>C<sub>4</sub>, Mo<sub>6</sub>C<sub>5</sub>, and Mo<sub>6</sub>C<sub>6</sub> clusters, and intermediate Mo<sub>8</sub>C<sub>12</sub>, Mo<sub>10</sub>C<sub>12</sub>, Mo<sub>12</sub>C<sub>6</sub>, Mo<sub>12</sub>C<sub>8</sub>, Mo<sub>12</sub>C<sub>10</sub>, and Mo<sub>14</sub>C<sub>13</sub> nanoparticles. Color code as in Fig. S3.

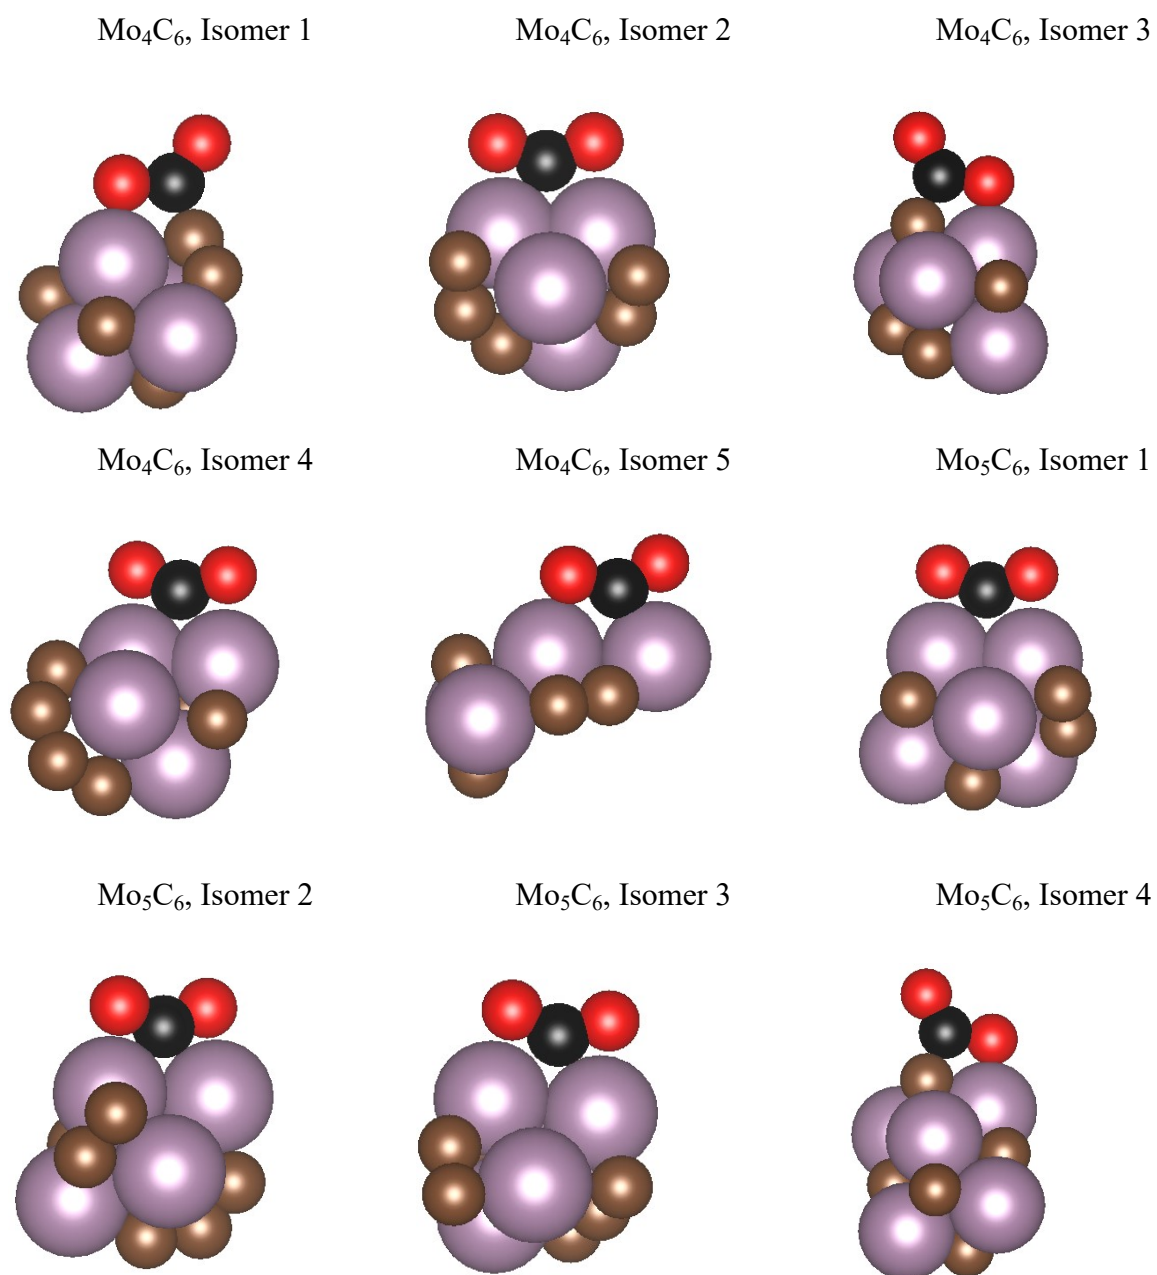

Mo<sub>6</sub>C<sub>4</sub>, Isomer 1

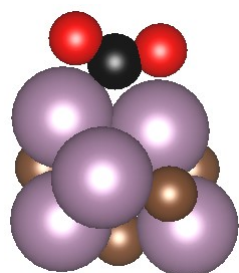

Mo<sub>6</sub>C<sub>4</sub>, Isomer 2

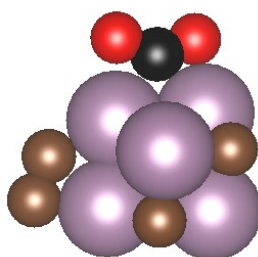

Mo<sub>6</sub>C<sub>4</sub>, Isomer 3

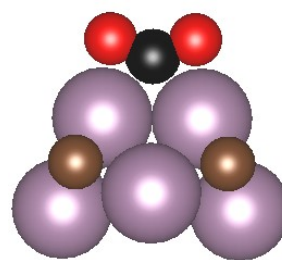

Mo<sub>6</sub>C<sub>4</sub>, Isomer 4

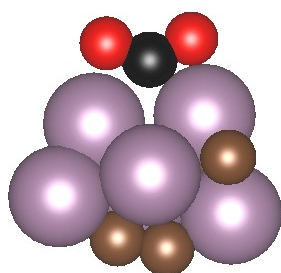

Mo<sub>6</sub>C<sub>4</sub>, Isomer 5

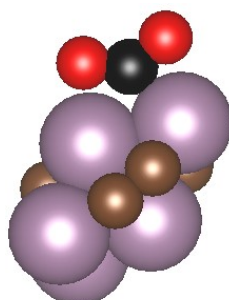

Mo<sub>6</sub>C<sub>5</sub>, Isomer 1

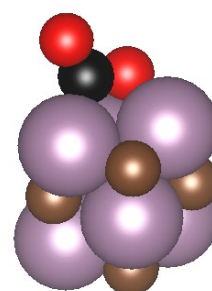

Mo<sub>6</sub>C<sub>5</sub>, Isomer 2

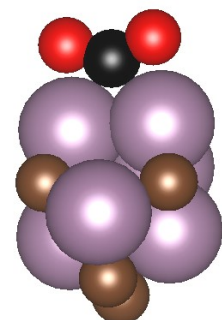

Mo<sub>6</sub>C<sub>6</sub>, Isomer 1

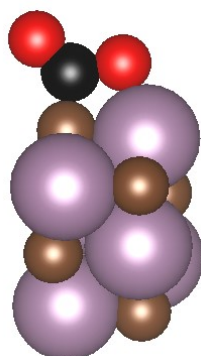

$\text{Mo}_8\text{C}_{12}$  (MetCar)

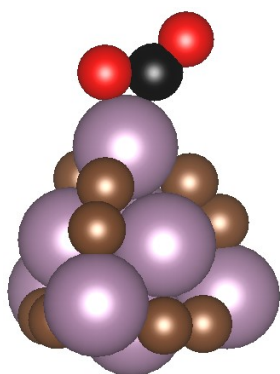

$\text{Mo}_{10}\text{C}_{12}$

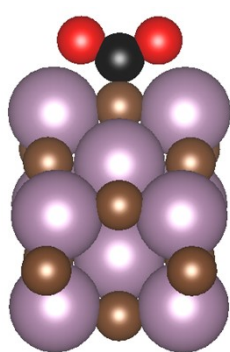

$\text{Mo}_{12}\text{C}_6$

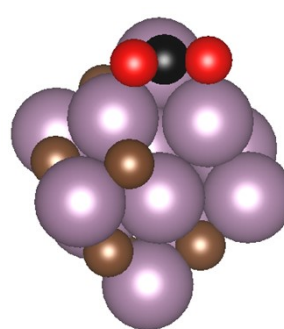

$\text{Mo}_{12}\text{C}_8$

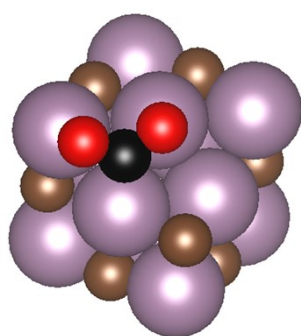

$\text{Mo}_{12}\text{C}_{10}$

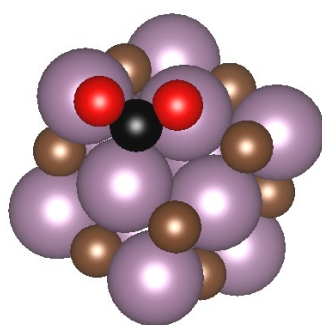

$\text{Mo}_{14}\text{C}_{13}$  (nanocube)

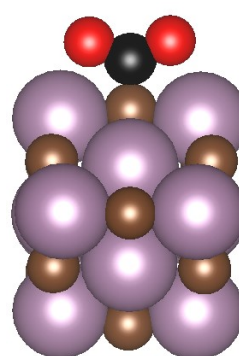

**Fig. S5.** Evolution of the attachment energy,  $E_{att}$ , in eV, and Bader charges,  $Q$ , in  $e$ , for  $\text{CO}_2$  adsorbed on small nanoparticles *via*  $\eta^3\text{-CO}_2\text{-}\mu^2\text{-C}_B\text{O}_M\text{O}_M$  mode, as a function of the Mo/C ratio.

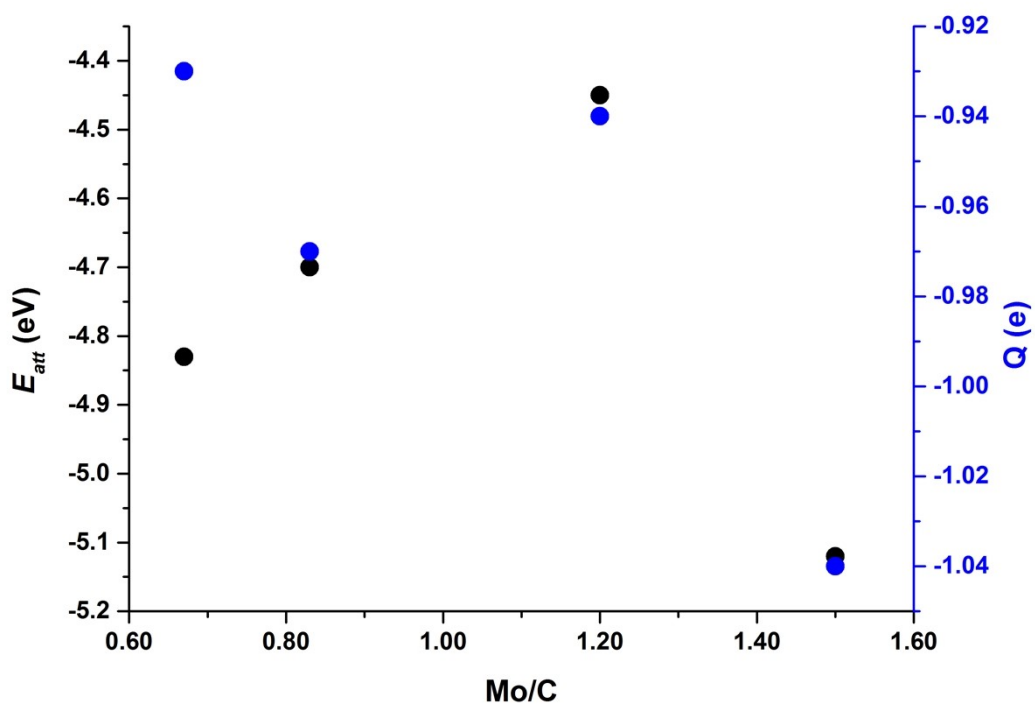



**Fig. S6.** CO<sub>2</sub> deformation energy,  $E_{def}$ , in eV, and Bader charge,  $Q$ , in  $e$ , for CO<sub>2</sub> adsorbed on the nanoparticles in  $S_{set}$  as a function of the Mo/C ratio, considering in each case the most stable structure, regardless of the bonding mode. Note that this is different from Fig. S5 where only the  $\eta^3$ -CO<sub>2</sub>- $\mu^2$ -C<sub>B</sub>O<sub>M</sub>O<sub>M</sub> bonding mode was always considered.

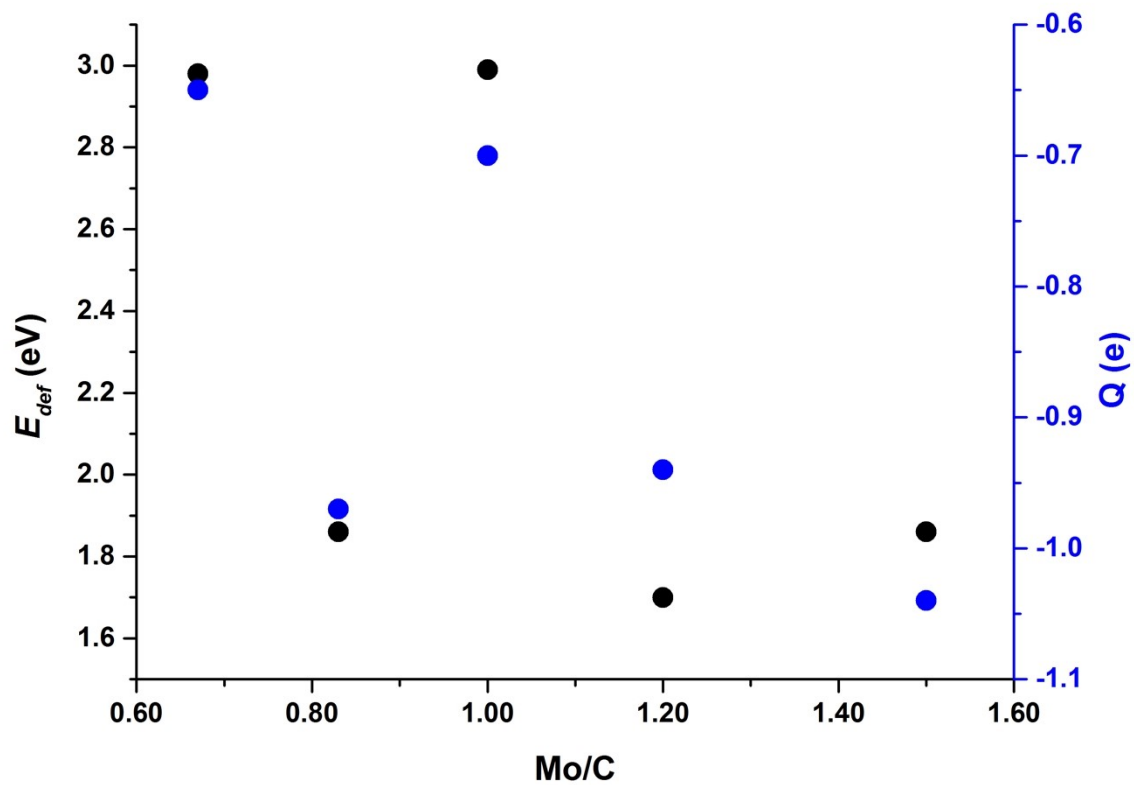

**Fig. S7.** CO<sub>2</sub> attachment energy,  $E_{att}$ , in eV, and Bader charges,  $Q$ , in  $e$ , on the adsorbed molecule for the most stable CO<sub>2</sub> bonding mode on the different nanoparticles.

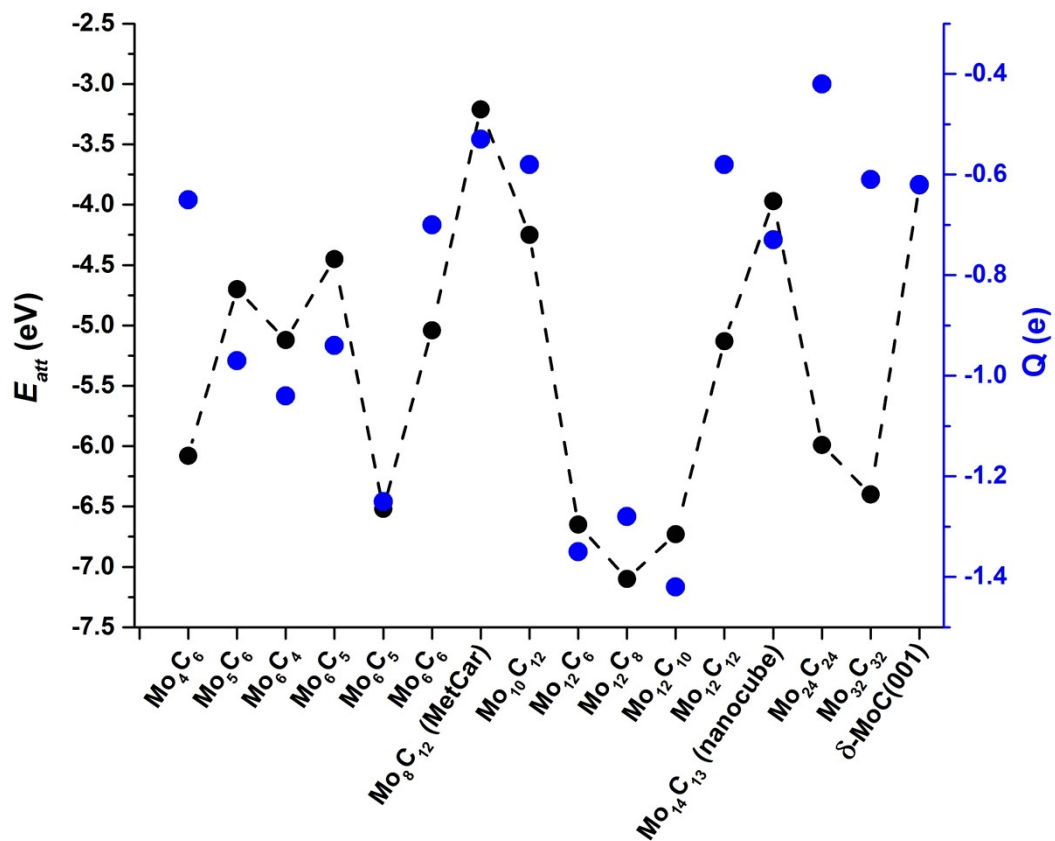



## References

---

- 1 C. Jimenez-Orozco, M. Figueras, E. Flórez, F. Viñes, J. A. Rodriguez and F. Illas, *J. Phys. Chem. C*, 2021, **125**, 6287–6297.
- 2 S. Posada-Pérez, F. Viñes, P. J. Ramirez, A. B. Vidal, J. A. Rodriguez and F. Illas, *Phys. Chem. Chem. Phys.*, 2014, **16**, 14912-14921.
- 3 M. Figueras, A. Jurado, A. Morales-García, F. Viñes, and F. Illas, *Phys. Chem. Chem. Phys.*, 2020, **22**, 19249-19253.
